# Supplementary material for: Isolation and Identification of Antioxidative Peptide from Goose Liver Hydrolysate to Ameliorate Alcohol-Mediated Oxidative Stress Damage in HHL-5 Hepatocytes
Source: MDPI journal article supplement (doi:10.3390/molecules27217151), 2022-10-22
Supplement: s1 [file s1]

## Supplementary Materials:

Table S1. Primers information for PCR

| Gene  | Forward (5'-3')       | Reverse (5'-3')         |
|-------|-----------------------|-------------------------|
| GAPDH | ATTCAACGGCACAGTCAAGG  | GCAGAAGGGGCGGAGATGA     |
| NRF2  | AGATGACCATGAGTCGCTTGC | CCAGCGAGGAGATCGATGAG    |
| AhR   | CCATCCCCGCTGAAGGAATTA | CTGCCAGTCTCTGATTTGTGC   |
| NQO1  | CATTGCAGTGGTTTGGGGTG  | TCTGGAAAGGACCGTTGTCG    |
| HO-1  | AAGCCGAGAATGCTGAGTTCA | GCCGTGTAGATATGGTACAAGGA |
